# Supplementary material for: Identification of Small Compounds Regulating the Secretion of Extracellular Vesicles via A TIM4-Affinity ELISA
Source: Research Square preprint supplement (doi:10.21203/rs.3.rs-151218/v1), 2021-02-03
Supplement: Supplementary file 1 [file 132b0cc707eb58f42a4eeb0f.docx]

Table 2. Structure of AA2 and its analogs.

|  |  |  |  |
| --- | --- | --- | --- |
| CAS 79183-19-0 | CAS 79183-32-7 | CAS 26960-66-7 | CAS 6037-73-6 |
| AA2 | #1 | #2 | #3 |
|  |  |  |  |
| CAS 79183-37-2 | CAS 303997-00-4 | CAS 313245-18-0 | CAS 90815-02-4 |
| #4 | #5 | #6 | #7 |
|  |  |  |  |
| CAS 206537-57-7 | CAS 13220-57-0 | CAS 1160247-92-6 |  |
| #8 | #9 | #10 |  |
