# Supplementary material for: Identification of Small Compounds Regulating the Secretion of Extracellular Vesicles via A TIM4-Affinity ELISA
Source: Research Square preprint supplement (doi:10.21203/rs.3.rs-151218/v1), 2021-02-03
Supplement: Supplementary file 2 [file f888d073a294bf1d10453025.docx]

**Supplementary information**

**Identification of small compounds regulating the secretion of extracellular vesicles via a TIM4-affinity ELISA**

Yunfei Ma1,2, *Takeshi Yoshida1,2, Kazutaka Matoba3, Katsuhiko Kida3, Rito Shintani1,2, Yingshi Piao4, Jingchun Jin5, Taito Nishino3, *Rikinari Hanayama1,2

1. WPI Nano Life Science Institute (NanoLSI), Kanazawa University

2. Department of Immunology, Graduate School of Medical Sciences, Kanazawa University

3. Nissan Chemical Corporation

4. Key Laboratory of Science and Technology Department (Jilin Province), Cancer Research Center, Yanbian University Medical College

5. Department of Internal Medicine of Yanbian University Hospital

*Corresponding authors: Takeshi Yoshida and Rikinari Hanayama

**
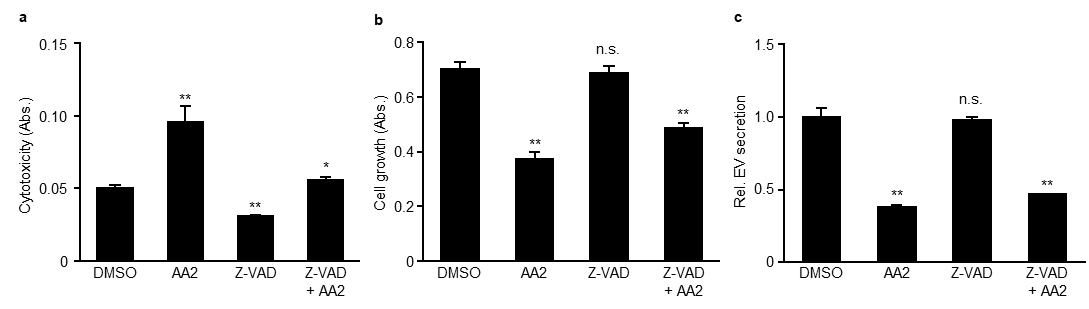
**

**Supplementary Figure S1.** AA2 inhibited EV secretion independent of caspase 3. (**a**–**c**) Jurkat cells were pre-treated with 0 or 50 μM Z-VAD(OMe)-FMK for 3 h, and then with 0 or 5 μM AA2 for 24 h. Cytotoxicity and cell growth were determined using lactate dehydrogenase (LDH) (**a**) and WST-8 (**b**) assays. (**c**) Secreted extracellular vesicles (EVs) were determined using a TIM4-CD81 ELISA. *; *p* < 0.05, vs. DMSO, Student's *t*-test.


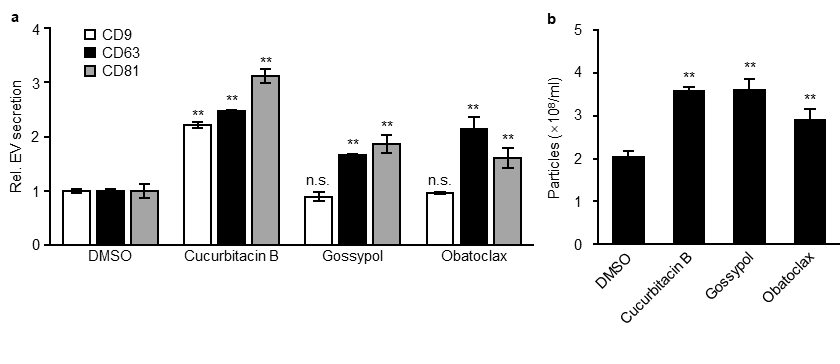
**Supplementary Figure S2.** Cucurbitacin B, gossypol, and obatoclax induced EV secretion in HEK293 cells. (**a**, **b**) HEK293 cells were treated with 1 μM cucurbitacin B, 0.3 μM gossypol, or 0.03 μM obatoclax for 24 h and then secreted EVs were determined using TIM4-CD9 and TIM4-CD63 ELISAs (**a**) or NTA (**b**). *; *p* < 0.05, **; *p* < 0.01, vs. DMSO, Student's *t*-test.
